# Supplementary material for: Efficacy of a novel antigen-decorated adenoviral vaccine platform against porcine respiratory coronavirus infection in a large natural host
Source: Research Square preprint supplement (doi:10.21203/rs.3.rs-7978161/v1), 2025-11-14
Supplement: Supplementary file 1 [file 0c150f33e7627828eea7b0fa.pdf]

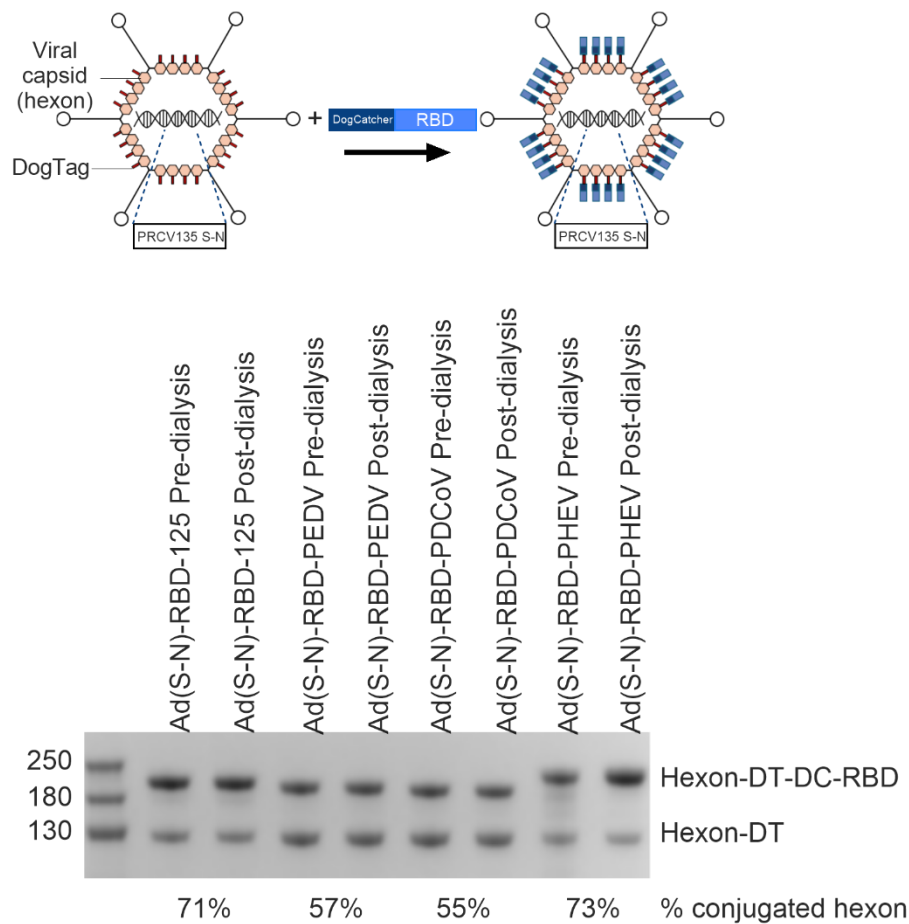

**Supplementary Figure S1: Vaccine production.** A) Schematic representation of modular display of DogCatcher-fused RBD on the surface of the adenovirus capsid via covalent conjugation with DogTag inserted into hexon surface loop 5 (HVR5). B) Representative SDS-PAGE and Coomassie blue staining analysis of Ad virions displaying DogTag at HVR5 ( $1\text{E}+10$  viral particles), incubated with  $3.5\text{ }\mu\text{M}$  of the 4 different DogCatcher-RBD proteins at  $4\text{ }^{\circ}\text{C}$  for 16 h (Pre-dialysis), followed by dialysis into sucrose storage buffer (Post-dialysis) to remove excess unbound DogCatcher-RBD, prior to immunisation.

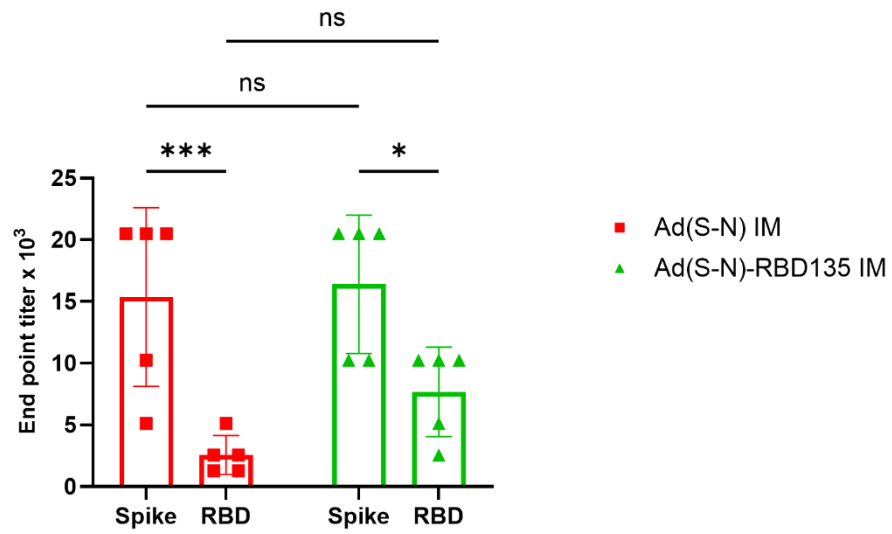

**Supplementary Figure S2: RBD and full-length spike ELISA.** Comparison between Spike-specific and RBD specific IgG response between S-N and S-N RBD group were analyzed by two-way ANOVA followed by Fisher LSD test.

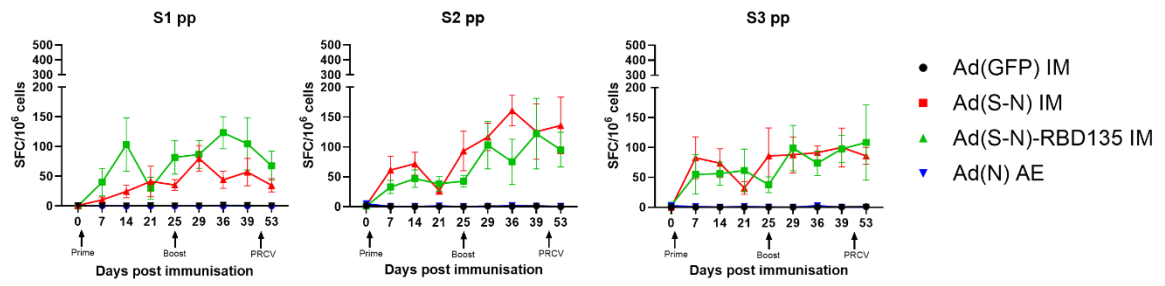

**Supplementary Figure S3: IFN $\gamma$  ELISPOT PBMC.** Cells producing IFN $\gamma$  in response to peptides spanning S were measured by ELISpot.

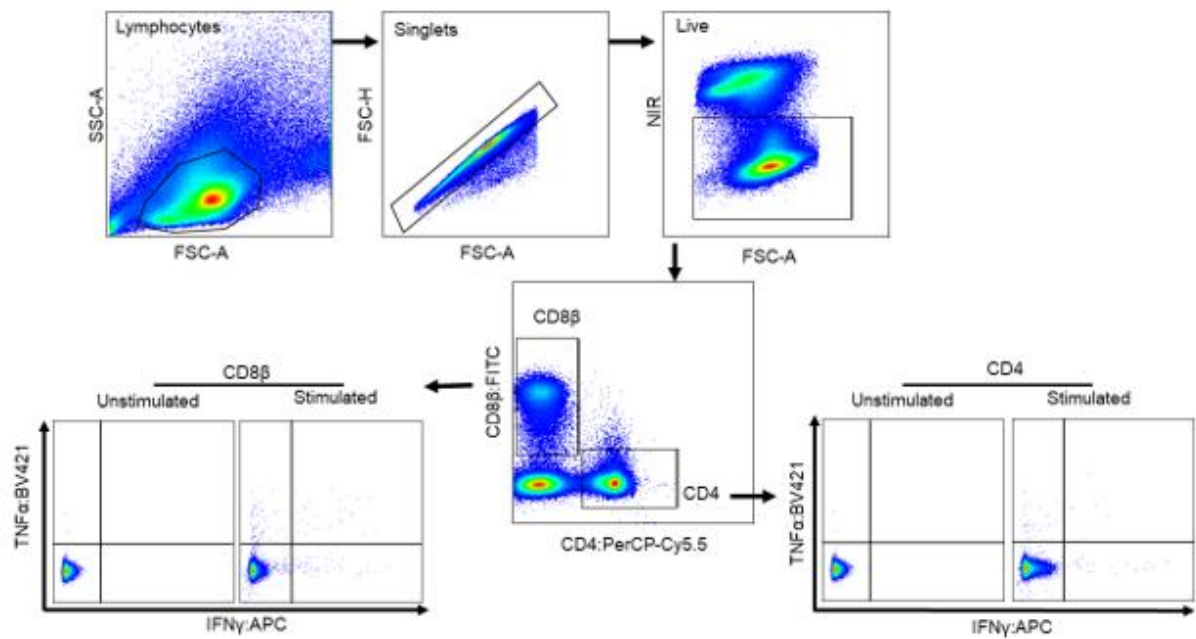

**Supplementary figure S4: Gating strategy for intracellular staining of T cells.**

Cryopreserved BAL samples were thawed and stimulated with PRCV135, Spike or N peptide pools or medium. Flow cytometry staining was performed. Sequential gating strategy was applied on lymphocytes, singlets, live cells and CD4 or CD8-beta. The frequencies of IFN $\gamma$  and TNF secreting CD4 $^{+}$  and CD8 $^{+}$  T cells were also analyzed.

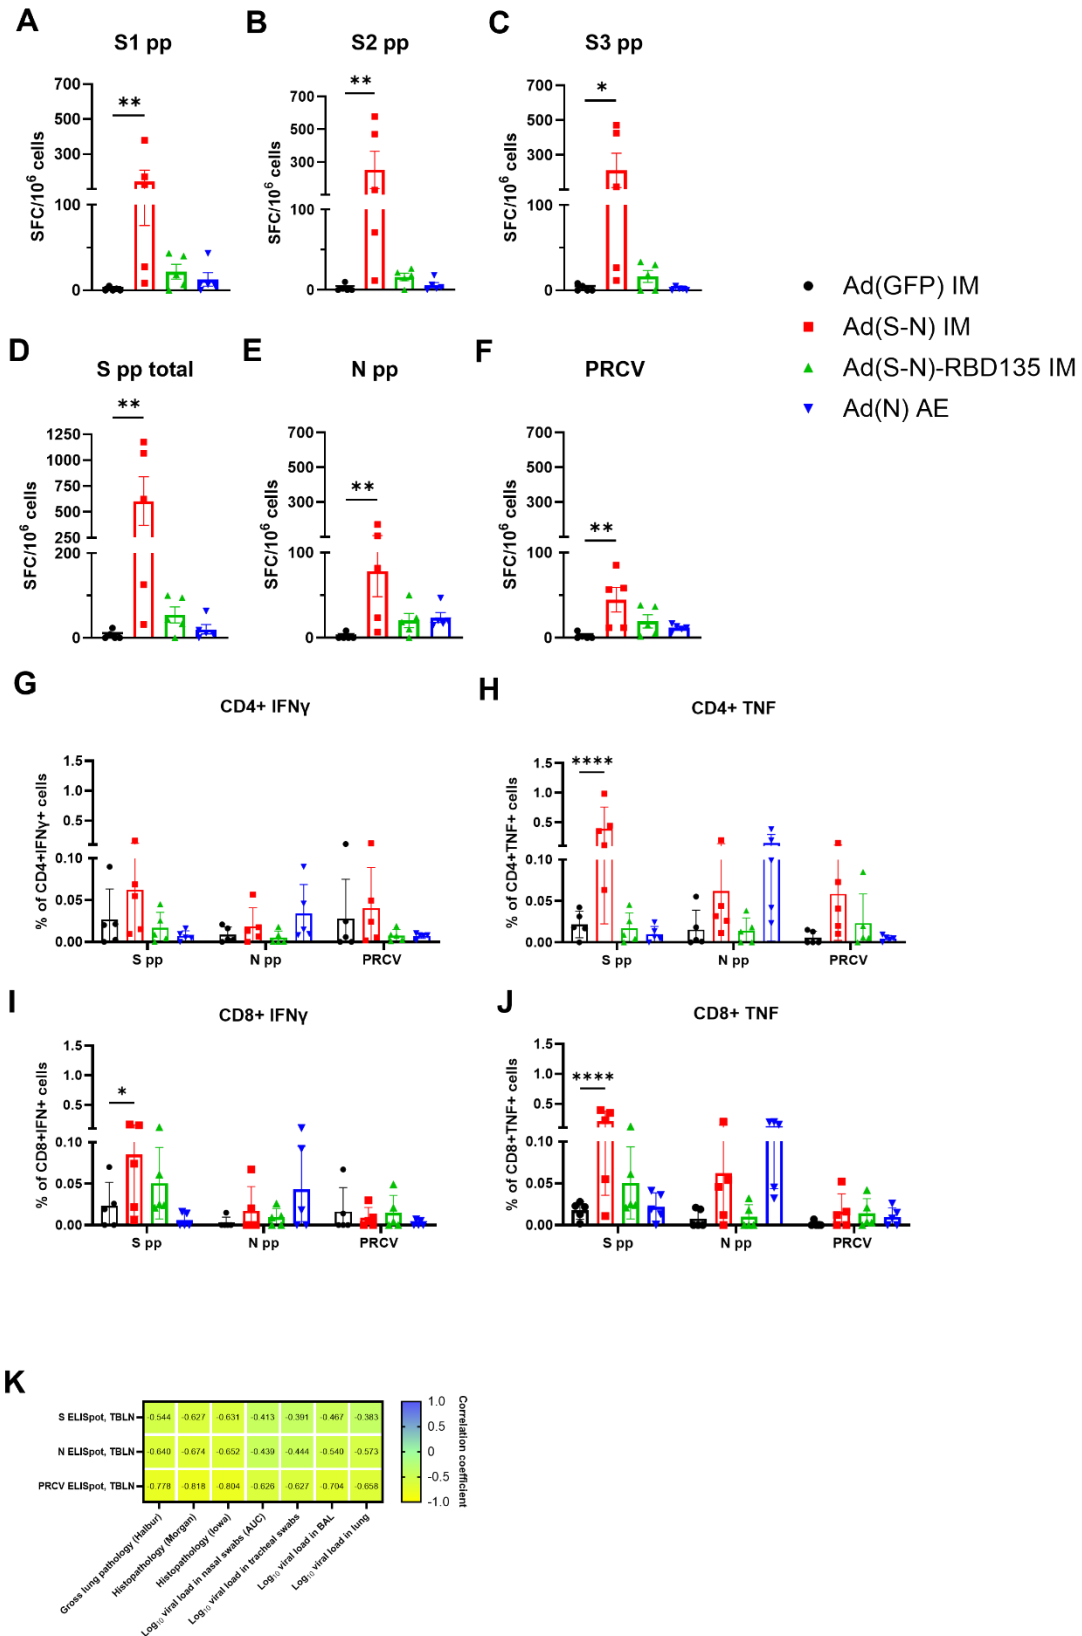

**Supplementary Figure S5: Cytokine responses in TBLN.** Cells producing IFN $\gamma$  in response to peptides spanning S (A-D) or N (E) proteins, or live PRCV 135 virus (F) were measured by ELISpot. Symbols in A-F represent mean spot-forming units per group, with error bars

representing SEM. IFN $\gamma$ - and TNF $\alpha$ -producing CD4 $^{+}$  and CD8 $^{+}$  T cells were measured following stimulation with whole virus or S or N peptides by intracellular cytokine staining (G-J). Data is presented as mean  $\pm$  SEM, with symbols indicating individual animals (A-J). Normally distributed data (D, F) was analysed by one-way ANOVA followed by Dunnett's post-hoc test, while data not normally distributed was analysed by Kruskal Wallis and Dunn's multiple comparison test (A-C, E). ICS data were analyzed and compared using Two-way ANOVA and Dunnett's test (G-J). Significant difference to Ad-(GFP) control is indicated by \* ( $p < 0.05$ ), \*\* ( $p < 0.01$ ), \*\*\*\* ( $p < 0.0001$ ).

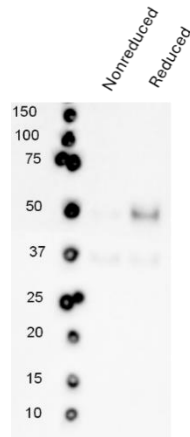

**Supplementary Figure S6: Western blot analysis of PRCV135 N protein from unpurified supernatant.** Expressed PRCV135 N protein was detected in supernatant by western blot following SDS-PAGE. N protein was detected using anti-C-tag, conjugated to biotin and probed with streptavidin-HRP. Presence of a band at approximately 50kDa indicated expression of N protein.

```

135 RBD      0 -----
135 full spike 1 MKKLFVVLVIMPLIYGDKFTSVVSNCTDQCASYVANVFVTQPGGFIPSDFSFNNWFLLTNSSTLVSGKLVTKQPLLVNCLWPVPSFEEAASTFCFEGAD
ISU-1      1 MKTLFVVLVIMPLIYGDNFP---CSNCTDQCASYVANVFVTQPGGFIPSDFSFNNWFLLTNSSTLVSGKLVTKQPLLVNCLWPVPSFEEAASTFCFEGAD

135 RBD      0 -----
135 full spike 101 FDQCNGAVLNNTVDVIRFNLNFTTNVQSGKGATVFSLNTTGGVTL EISCYNDTVSDSSFASYGEIPFGVTNGPRYCYVLYNGTALKYLGLTPPSVKEIAI
ISU-1      98 FDQCNGAVLNNTVDVIRFNLNFTTNVQSGKGATVFSLNTTGGVTL EISCYNDTVSDSSFASYGEIPFGVTDGPRYCYVLYNGTALKYLGLTPPSVKEIAI

135 RBD      1 -----S
135 full spike 201 SKWGHFYINGYNFFSTFPIDCISFNLTTGSDSDVFWTIAYTSYTDALVQVENTAITNTVTCNSYVNNIKCSQLTANLNGFYVSSSEVGSVNKSVVLLPS
ISU-1      198 SKWGHFYINGYNFFSTFPIDCISFNLTTGSDSDVFWTIAYTSYTEALVQVENTAITNTVTCNSYVNNIKCSQLTANLNGFYVSSSEVGLVNKSVVLLPS

135 RBD      2 -----
135 full spike 301 FLTHITIVNITIGLGMKRSGYGQPIASTLSNITLPMQANNTDVYCVRSQDFSVYVHSTCKSALWDNVFKRNC TDVLDATAVIKTGTCPF SFDKLNLYLTFN
ISU-1      298 FLTHITIVNITIGLGMKRSGYGQPIASTLSNITLPTQDNNTDVYCTLSDQFSVYVHSTCKSALWDNVFKRNC TDVLDATAVIKTGTCPF SFDKLNLYLTFN

135 RBD      102 -----
135 full spike 401 KFCLSLSPVGANCKFDVAARTRTNDQVRSLYVIEEGDSIVGVPSDNSGLHDL SVLHLDSDCTDYNIGRTGVGII RQTNRLLSGLYYTSLSGDLLGFK
ISU-1      398 KFCLSLSPVGANCKFDVVARTRTNDQVRSLYVIEEGDNIIVGVPSDNSGLHDL SVLHLDSDCTDYNIGRTGVGII RQTNRLLSGLYYTSLSGDLLGFK

135 RBD      150 -----
135 full spike 501 NVSDGVIYSVTPCDVSAQAATIDGTIVGAITSINSELLGLTHWTTIPNFYYSIYNYTNDKTRGTPIGSNDVDCEPVITYSNI GVKNGALVFINVTHSD
ISU-1      498 NVSDGVIYSVTPCDVSAQAATIDGTIVGAITSINSELLGLTHWTTIPNFYYSIYNYTNDRI RGTPIGSNDVDCEPVITYSNI GVKNGALVFINVTHSD

135 RBD      150 -----
135 full spike 601 GDVQPISTGNVTIPTNFTISVQVEYIQVYTPVSDCSRYVCNGNPRCNKLLTQYVSACQTIEQALAMGARLENMEVDSMLFVSENALKLASVEAFNSSE
ISU-1      598 GDVQPISTGNVTIPTNFTISVQVEYIQVYTPVSDCSRYVCNGNPRCNKLLTQYVSACQTIEQALAMSGARLENMEVDSMLFVSENALKLASVEAFNSSE

135 RBD      150 -----
135 full spike 701 TLDPIYKEWPNIGGFLEGLKYILPSDNSKRNYRSAIEDLLFSKVVTSGLGTVD EYKRC TGGYDIADLVCAQYYNGIMVLPGVANADKMTMYTASLAGG
ISU-1      698 TLDPIYKDWPNIGGSWLEGLKYILPSDNSKRQYRSAIEDLLFSKVVTSGLGTVD EYKRC TGGYDIADLVCAQYYNGIMVLPGVANADKMTMYTASLAGG

135 RBD      150 -----
135 full spike 801 ITLGALGGGAVAI PF FAVAVQARLN YVALQTDV LNK NQQILASAFNQ AIGNITQSF GKVNDAIHQTSRGLTTVAKALAKVQDVVNTQGQALRH LTVQLQNN
ISU-1      798 ITLGALGGGAVAI PF FAVAVQARLN YVALQTDV LNK NQQILASAFNQ AIGNITQSF GKVNDAIHQTSRGLATVAKALAKVQDVVNTQGQALSH LTVQLQNN

135 RBD      150 -----
135 full spike 901 FQAISSSIDIYNRLDELSADAQVDRLITGRLTALNAFVSQTLTRQAEVRASRQLAKDKVNECVRSQSQRFGFCGNGTHL FSLANAAPNGMIF FHTVLLP
ISU-1      898 FQAISSSIDIYNRLDELSADAQVDRLITGRLTALNAFVSQTLTRQAEVRASRQLAKDKVNECVRSQSQRFGFCGNGTHL FSLANAAPNGMIF FHTVLLP

135 RBD      150 -----
135 full spike 1001 TAYETVTAWSGICALDGDRTFGLVVKDVQLTLFRNLDDKFYLTPTRTMYQPRVATSSDFVQIEGCDVLFVNTTVSDLP SIIPDYIDINQTVQDILENFRPN
ISU-1      998 TAYETVTAWAGICALDGDRTFGLVVKDVQLTLFRNLDDKFYLTPTRTMYQPRVATSSDFVQIEGCDVLFVNTTVSDLP SIIPDYIDINQTVQDILENFRPN

135 RBD      150 -----
135 full spike 1101 WTVPELTLDVFNATYLNLTGEIDDLFRSEKLHNTTVELAILIDNINNTLVNLEWLNRIETYVKWPWYVWLLIGLVVIFCIPLLLFCCFSTGCCGIGCL
ISU-1      1098 WTVPDLTDFDIFNATYLNLTVEIDDLFRSEKLHNTTVELAILIDNINNTLVNLEWLNRIETYVKWPWYVWLLIGLVVIFCIPLLLFCCFSTGCCGIGCL

135 RBD      150 -----
135 full spike 1201 GSCCHSIFSRQFENYEPKIEKVHVH
ISU-1      1198 GSCCHSICSRQFENYEPKIEKVHVH

```

**Supplementary Figure S7: Sequence alignment of ISU-1 and 135 spike proteins.** Amino acid sequences for the 135 and ISU-1 spike proteins were aligned using MUSCLE. Highlighted amino acids differ from the consensus sequence.
